# Supplementary material for: Specialized inpatient treatment of adult anorexia nervosa: effectiveness and clinical significance of changes
Source: PubMed Central journal article supplement (PMC4172844; doi:10.1186/s12888-014-0258-z), 2014-09-06
Supplement: 12888_2014_258_MOESM1_ESM.pdf [file 12888_2014_258_MOESM1_ESM.pdf]

Additional file 1: Pre-treatment scores of patients, community norms, Cronbach's Alpha and criterion C for each outcome measure

|                         | <b>N</b>        | <b>M</b>        | <b>SD</b>       | <b>M</b>    | <b>SD</b>   | <b>Cron-</b>                      | <b>Crite-</b>     | <b>%</b>        |
|-------------------------|-----------------|-----------------|-----------------|-------------|-------------|-----------------------------------|-------------------|-----------------|
|                         | <b>Patients</b> | <b>Patients</b> | <b>Patients</b> | <b>Norm</b> | <b>Norm</b> | <b>bach's <math>\alpha</math></b> | <b>riterion C</b> | <b>Norma-</b>   |
|                         |                 |                 |                 |             |             | <b>Patients</b>                   |                   | <b>tive</b>     |
|                         |                 |                 |                 |             |             |                                   |                   | <b>patients</b> |
| <b>EDI-2</b>            |                 |                 |                 |             |             |                                   |                   |                 |
| Drive for Thinness      | 434             | 29.60           | 8.65            | 17.3        | 6.8         | .89                               | 22.71             | 21.8            |
| Bulimia                 | 434             | 16.73           | 9.26            | 10.6        | 3.4         | .92                               | 12.25             | 41.7            |
| Body Dissatisfaction    | 429             | 38.21           | 9.40            | 30.2        | 10.3        | .85                               | 34.39             | 37.0            |
| Ineffectiveness         | 429             | 37.33           | 10.78           | 23.5        | 5.7         | .91                               | 28.28             | 21.3            |
| Perfectionism           | 434             | 23.17           | 6.27            | 16.5        | 5.7         | .77                               | 19.68             | 25.1            |
| Interpersonal Mistrust  | 432             | 24.01           | 6.89            | 18.4        | 4.4         | .84                               | 20.59             | 29.6            |
| Interoceptive Awareness | 434             | 36.25           | 9.63            | 22          | 5.7         | .84                               | 27.30             | 16.9            |
| Maturity Fears          | 431             | 27.78           | 8.04            | 20.8        | 4.7         | .83                               | 23.37             | 26.9            |
| Asceticism              | 429             | 26.23           | 7.51            | 16.5        | 4           | .78                               | 19.88             | 17.3            |
| Impulse regulation      | 427             | 28.75           | 8.10            | 23.6        | 6.3         | .77                               | 25.85             | 36.4            |
| Social Insecurity       | 433             | 28.52           | 6.86            | 22          | 4.7         | .78                               | 24.65             | 26.4            |
| EDI-2 Global score      | 433             | 315.96          | 63.86           | 223.2       | 38.1        | .96                               | 257.86            | 20.6            |
| <b>BSI GSI</b>          | 431             | 1.37            | 0.72            | 0.35        | 0.23        | .96                               | 0.60              | 15.7            |
| <b>BDI-2</b>            | 381             | 28.37           | 12.22           | 7.4         | 7.3         | .92                               | 15.24             | 13.9            |

Notes: EDI-2=Eating disorder inventory-2, BSI=Brief symptom inventory, GSI=Global severity index, BDI-2=Beck depression inventory-2, norms for the healthy samples were taken from the applicable norms [24, 26, 28]
