# Supplementary material for: Specialized inpatient treatment of adult anorexia nervosa: effectiveness and clinical significance of changes
Source: PubMed Central journal article supplement (PMC4172844; doi:10.1186/s12888-014-0258-z), 2014-09-06
Supplement: 12888_2014_258_MOESM2_ESM.pdf [file 12888_2014_258_MOESM2_ESM.pdf]

Additional file 2: Classification of treatment outcome (EDI-2 subscales) based on the criteria of Jacobson and Truax [14]

|                         | <b>Deteriorated (%)</b> | <b>Unchanged (%)</b> | <b>Reliably improved (%)</b> | <b>Clinically significantly improved (%)</b> |
|-------------------------|-------------------------|----------------------|------------------------------|----------------------------------------------|
| Drive for Thinness      | 3 (1.1)                 | 135 (48.7)           | 48 (17.3)                    | 91 (32.9)                                    |
| Bulimia                 | 1 (0.5)                 | 87 (42.9)            | 38 (18.7)                    | 77 (37.9)                                    |
| Body Dissatisfaction    | 6 (2.8)                 | 152 (70.7)           | 16 (7.4)                     | 41 (19.1)                                    |
| Ineffectiveness         | 4 (1.5)                 | 156 (57.1)           | 36 (13.2)                    | 77 (28.2)                                    |
| Perfectionism           | 5 (2.0)                 | 232 (90.6)           | 7 (2.7)                      | 12 (4.7)                                     |
| Interpersonal Distrust  | 5 (2.1)                 | 193 (79.4)           | 16 (6.6)                     | 29 (11.9)                                    |
| Interoceptive Awareness | 3 (1.0)                 | 188 (64.6)           | 40 (13.7)                    | 60 (20.6)                                    |
| Maturity Fears          | 2 (0.8)                 | 189 (77.5)           | 17 (7.0)                     | 36 (14.8)                                    |
| Asceticism              | 4 (1.4)                 | 213 (73.2)           | 34 (11.7)                    | 40 (13.7)                                    |
| Impulse Regulation      | 2 (0.9)                 | 174 (77.7)           | 6 (2.7)                      | 42 (18.8)                                    |
| Social Insecurity       | 4 (1.6)                 | 201 (78.2)           | 12 (4.7)                     | 40 (15.6)                                    |
